# Supplementary material for: Biomolecular Evaluation of Piceatannol’s Effects in Counteracting the Senescence of Mesenchymal Stromal Cells: A New Candidate for Senotherapeutics?
Source: MDPI journal article supplement (doi:10.3390/ijms222111619), 2021-10-27
Supplement: s1 [file s1]

**Supp File 1**

**Data Analysis**

# Results for Table 1

## ANOVA

### ANOVA - Live Cell

| Cases    | Sum of Squares | df | Mean Square | F     | p      |
|----------|----------------|----|-------------|-------|--------|
| V1       | 9343.62        | 6  | 1557.270    | 240.5 | < .001 |
| Residual | 90.67          | 14 | 6.476       |       |        |

*Note.* Type III Sum of Squares

## Post Hoc Tests

### Post Hoc Comparisons - V1

|            | Mean Difference | SE    | t       | p <sub>tukey</sub> | Symbol |
|------------|-----------------|-------|---------|--------------------|--------|
| CT 0.001μM | 4.667           | 2.078 | 2.246   | 0.332              |        |
| 0.01μM     | -4.333          | 2.078 | -2.085  | 0.410              |        |
| 0.1μM      | -3.667          | 2.078 | -1.765  | 0.589              |        |
| 1μM        | -6.667          | 2.078 | -3.208  | 0.072              |        |
| 10μM       | -8.333          | 2.078 | -4.011  | 0.017              | *      |
| 100μM      | -64.000         | 2.078 | -30.801 | < .001             | ***    |

# Results Figure 1A

## ANOVA

### ANOVA - beta-Gal

| Cases    | Sum of Squares | df | Mean Square | F     | p      |
|----------|----------------|----|-------------|-------|--------|
| V1       | 361.17         | 5  | 72.233      | 37.15 | < .001 |
| Residual | 23.33          | 12 | 1.944       |       |        |

*Note.* Type III Sum of Squares

## Post Hoc Tests

### Post Hoc Comparisons - V1

|            | Mean Difference | SE    | t      | p <sub>tukey</sub> | Symbol |
|------------|-----------------|-------|--------|--------------------|--------|
| CT 0.001μM | -3.333          | 1.139 | -2.928 | 0.102              |        |
| 0.01μM     | -7.333          | 1.139 | -6.441 | < .001             | ***    |
| 0.1μM      | -11.333         | 1.139 | -9.954 | < .001             | ***    |
| 1μM        | -11.333         | 1.139 | -9.954 | < .001             | ***    |
| 10μM       | -11.333         | 1.139 | -9.954 | < .001             | ***    |

# Results Figure 1B

## ANOVA

### ANOVA - Live Cell

| Cases    | Sum of Squares | df | Mean Square | F     | p      |
|----------|----------------|----|-------------|-------|--------|
| V1       | 1562.7         | 5  | 312.53      | 17.26 | < .001 |
| Residual | 217.3          | 12 | 18.11       |       |        |

*Note.* Type III Sum of Squares

## Post Hoc Tests

### Post Hoc Comparisons - V1

|            | Mean Difference | SE    | t      | p <sub>tukey</sub> | Symbol |
|------------|-----------------|-------|--------|--------------------|--------|
| CT 0.001μM | 0.667           | 3.475 | 0.192  | 1.000              |        |
| 0.01μM     | 0.333           | 3.475 | 0.096  | 1.000              |        |
| 0.1μM      | -0.333          | 3.475 | -0.096 | 1.000              |        |
| 1μM        | -12.000         | 3.528 | -3.402 | 0.047              | *      |
| 10μM       | -25.333         | 3.475 | -7.291 | < .001             | ***    |

# Results Figure 2A

## ANOVA

### ANOVA - beta-Gal

| Cases    | Sum of Squares | df | Mean Square | F     | p      |
|----------|----------------|----|-------------|-------|--------|
| V1       | 6221.9         | 11 | 565.626     | 106.1 | < .001 |
| Residual | 128.0          | 24 | 5.333       |       |        |

*Note.* Type III Sum of Squares

## Post Hoc Tests

### Post Hoc Comparisons - V1

|    |           | Mean Difference | SE    | t       | p <sub>tukey</sub> | Symbol |
|----|-----------|-----------------|-------|---------|--------------------|--------|
| CT | H         | -11.000         | 1.886 | -5.834  | < .001             | ###    |
|    | R         | -33.667         | 1.886 | -17.854 | < .001             | ###    |
| CT | ABT       | -2.667          | 1.886 | -1.414  | 0.949              |        |
|    | PCT1μM    | 2.000           | 1.886 | 1.061   | 0.994              |        |
|    | PCT10μM   | 2.667           | 1.886 | 1.414   | 0.949              |        |
| H  | H+ABT     | 8.000           | 1.886 | 4.243   | 0.012              | **     |
|    | PCT1μM    | 13.000          | 1.886 | 6.894   | < .001             | ***    |
|    | PCT10μM   | 13.667          | 1.886 | 7.248   | < .001             | ***    |
| R  | R+ABT     | 12.667          | 1.886 | 6.718   | < .001             | ***    |
|    | R+PCT1μM  | 3.000           | 1.886 | 1.591   | 0.896              |        |
|    | R+PCT10μM | 12.667          | 1.886 | 6.718   | < .001             | ***    |

# Results Figure 2B

## ANOVA

### ANOVA - Annexin

| Cases    | Sum of Squares | df | Mean Square | F     | p      |
|----------|----------------|----|-------------|-------|--------|
| V1       | 3966.1         | 11 | 360.553     | 66.22 | < .001 |
| Residual | 130.7          | 24 | 5.444       |       |        |

Note. Type III Sum of Squares

## Post Hoc Tests

### Post Hoc Comparisons - V1

|    |           | Mean Difference | SE    | t         | p <sub>tukey</sub> | Symbol |
|----|-----------|-----------------|-------|-----------|--------------------|--------|
| CT | H         | -8.667          | 1.905 | -4.549    | 0.006              | ##     |
|    | R         | 5.333           | 1.905 | 2.799     | 0.241              |        |
| CT | ABT       | 0.667           | 1.905 | 0.350     | 1.000              |        |
|    | PCT1μM    | 1.776e-15       | 1.905 | 9.324e-16 | 1.000              |        |
|    | PCT10μM   | 2.665e-15       | 1.905 | 1.399e-15 | 1.000              |        |
| H  | H+ABT     | -15.333         | 1.905 | -8.048    | < .001             | ***    |
|    | H+PCT1μM  | -4.667          | 1.905 | -2.449    | 0.414              |        |
|    | H+PCT10μM | -17.000         | 1.905 | -8.923    | < .001             | ***    |
| R  | R+ABT     | -3.333          | 1.905 | -1.750    | 0.828              |        |
|    | R+PCT1μM  | 1.000           | 1.905 | 0.525     | 1.000              |        |
|    | R+PCT10μM | -1.667          | 1.905 | -0.875    | 0.999              |        |

# Results Figure 3A

## ANOVA

### ANOVA - 24h CCK-8

| Cases    | Sum of Squares | df | Mean Square | F     | p     |
|----------|----------------|----|-------------|-------|-------|
| V1       | 0.003          | 11 | 3.172e -4   | 1.730 | 0.127 |
| Residual | 0.004          | 24 | 1.833e -4   |       |       |

Note. Type III Sum of Squares

### Post Hoc Tests 24h

#### Post Hoc Comparisons - V1

|                 | Mean Difference | SE    | t          | p <sub>tukey</sub> | Symbol |
|-----------------|-----------------|-------|------------|--------------------|--------|
| CT H            | 0.023           | 0.011 | 2.111      | 0.620              |        |
| R               | 0.020           | 0.011 | 1.809      | 0.798              |        |
| CT ABT          | 0.003           | 0.011 | 0.302      | 1.000              |        |
| PCT1 $\mu$ M    | -0.010          | 0.011 | -0.905     | 0.998              |        |
| PCT10 $\mu$ M   | 1.110e -16      | 0.011 | 1.004e -14 | 1.000              |        |
| H H+ABT         | -0.027          | 0.011 | -2.412     | 0.434              |        |
| H+PCT1 $\mu$ M  | -0.027          | 0.011 | -2.412     | 0.435              |        |
| H+PCT10 $\mu$ M | -0.010          | 0.011 | -0.905     | 0.998              |        |
| R R+ABT         | -0.013          | 0.011 | -1.206     | 0.983              |        |
| R+PCT1 $\mu$ M  | -0.020          | 0.011 | -1.809     | 0.798              |        |
| R+PCT10 $\mu$ M | -0.010          | 0.011 | -0.905     | 0.998              |        |

## ANOVA

### ANOVA - 48 CCK-8

| Cases    | Sum of Squares | df | Mean Square | F     | p      |
|----------|----------------|----|-------------|-------|--------|
| V1       | 0.911          | 11 | 0.083       | 26.91 | < .001 |
| Residual | 0.074          | 24 | 0.003       |       |        |

Note. Type III Sum of Squares

### Post Hoc Tests 48h

#### Post Hoc Comparisons - V1

|              | Mean Difference | SE    | t      | p <sub>tukey</sub> | Symbol |
|--------------|-----------------|-------|--------|--------------------|--------|
| 48h CT H     | 0.183           | 0.045 | 4.047  | 0.018              | ##     |
| R            | 0.443           | 0.045 | 9.787  | < .001             | ###    |
| CT ABT       | 0.100           | 0.045 | 2.208  | 0.560              |        |
| PCT1 $\mu$ M | -0.050          | 0.045 | -1.104 | 0.991              |        |

### Post Hoc Comparisons - V1

|   |           | Mean Difference | SE    | t      | p <sub>tukey</sub> | Symbol |
|---|-----------|-----------------|-------|--------|--------------------|--------|
|   | PCT10μM   | -0.030          | 0.045 | -0.662 | 1.000              |        |
| H | H+ABT     | -0.093          | 0.045 | -2.060 | 0.652              |        |
|   | H+PCT1μM  | -0.047          | 0.045 | -1.030 | 0.995              |        |
|   | H+PCT10μM | -0.087          | 0.045 | -1.913 | 0.741              |        |
| R | R+ABT     | -0.117          | 0.045 | -2.576 | 0.345              |        |
|   | R+PCT1μM  | -0.150          | 0.045 | -3.311 | 0.093              | *      |
|   | R+PCT10μM | -0.230          | 0.045 | -5.078 | 0.002              | **     |

## ANOVA

### ANOVA - 72 CCK-8

| Cases    | Sum of Squares | df | Mean Square | F     | p      |
|----------|----------------|----|-------------|-------|--------|
| V1       | 51.654         | 11 | 4.696       | 205.6 | < .001 |
| Residual | 0.548          | 24 | 0.023       |       |        |

Note. Type III Sum of Squares

### Post Hoc Tests

#### Post Hoc Comparisons - V1

|    |           | Mean Difference | SE    | t      | p <sub>tukey</sub> | Symbol |
|----|-----------|-----------------|-------|--------|--------------------|--------|
| CT | H         | 2.100           | 0.123 | 17.020 | < .001             | ###    |
|    | R         | 3.083           | 0.123 | 24.989 | < .001             | ###    |
| CT | ABT       | 0.300           | 0.123 | 2.431  | 0.424              |        |
|    | PCT1μM    | 0.033           | 0.123 | 0.270  | 1.000              |        |
|    | PCT10μM   | 0.067           | 0.123 | 0.540  | 1.000              |        |
| H  | H+ABT     | -1.200          | 0.123 | -9.726 | < .001             | ***    |
|    | H+PCT1μM  | -0.233          | 0.123 | -1.891 | 0.753              |        |
|    | H+PCT10μM | -0.400          | 0.123 | -3.242 | 0.107              |        |
| R  | R+ABT     | -0.383          | 0.123 | -3.107 | 0.138              |        |
|    | R+PCT1μM  | -0.703          | 0.123 | -5.700 | < .001             | ***    |
|    | R+PCT10μM | -1.017          | 0.123 | -8.240 | < .001             | ***    |

# Results figure 3B

## ANOVA

### ANOVA - Ki67

| Cases    | Sum of Squares | df | Mean Square | F     | p      |
|----------|----------------|----|-------------|-------|--------|
| V1       | 1862.8         | 11 | 169.34      | 11.04 | < .001 |
| Residual | 368.0          | 24 | 15.33       |       |        |

*Note.* Type III Sum of Squares

### Post Hoc Tests

#### Post Hoc Comparisons - V1

|                 | Mean Difference | SE    | t      | p <sub>tukey</sub> | Symbol |
|-----------------|-----------------|-------|--------|--------------------|--------|
| CT H            | 6.000           | 3.197 | 1.877  | 0.762              |        |
| R               | 21.000          | 3.197 | 6.568  | < .001             | ###    |
| CT ABT          | -0.667          | 3.197 | -0.209 | 1.000              |        |
| PCT1 $\mu$ M    | -3.667          | 3.197 | -1.147 | 0.988              |        |
| PCT10 $\mu$ M   | 2.333           | 3.197 | 0.730  | 1.000              |        |
| H H+ABT         | -2.333          | 3.197 | -0.730 | 1.000              |        |
| H+PCT1 $\mu$ M  | -5.333          | 3.197 | -1.668 | 0.866              |        |
| H+PCT10 $\mu$ M | -7.667          | 3.197 | -2.398 | 0.443              |        |
| R R+ABT         | -17.667         | 3.197 | -5.526 | 0.011              | **     |
| R+PCT1 $\mu$ M  | -8.667          | 3.197 | -2.711 | 0.009              | **     |
| R+PCT10 $\mu$ M | -28.667         | 3.197 | -8.966 | < .001             | ***    |



# Results figure 3C

## ANOVA

### ANOVA - G1 Cell Cycle

| Cases    | Sum of Squares | df | Mean Square | F     | p      |
|----------|----------------|----|-------------|-------|--------|
| V1       | 3457.6         | 11 | 314.331     | 32.52 | < .001 |
| Residual | 232.0          | 24 | 9.667       |       |        |

*Note.* Type III Sum of Squares

### Post Hoc Tests

#### Post Hoc Comparisons - V1

|           | Mean Difference | SE    | t      | p tukey | Symbol |
|-----------|-----------------|-------|--------|---------|--------|
| CT H      | -7.333          | 2.539 | -2.889 | 0.207   |        |
| R         | -21.000         | 2.539 | -8.272 | < .001  | ###    |
| CT ABT    | 2.667           | 2.539 | 1.050  | 0.994   |        |
| PCT1μM    | -0.333          | 2.539 | -0.131 | 1.000   |        |
| PCT10μM   | -1.333          | 2.539 | -0.525 | 1.000   |        |
| H H+ABT   | 20.667          | 2.539 | 8.141  | < .001  | ***    |
| H+PCT1μM  | 23.333          | 2.539 | 9.191  | < .001  | ***    |
| H+PCT10μM | 14.333          | 2.539 | 5.646  | < .001  | ***    |
| R R+ABT   | 20.333          | 2.539 | 8.010  | < .001  | ***    |
| R+PCT1μM  | 10.667          | 2.539 | 4.202  | 0.013   | *      |
| R+PCT10μM | 28.667          | 2.539 | 11.292 | < .001  | ***    |

## ANOVA

### ANOVA - S Cell Cycle

| Cases    | Sum of Squares | df | Mean Square | F     | p      |
|----------|----------------|----|-------------|-------|--------|
| V1       | 1802.3         | 11 | 163.85      | 15.94 | < .001 |
| Residual | 246.7          | 24 | 10.28       |       |        |

*Note.* Type III Sum of Squares

## Post Hoc Tests

### Post Hoc Comparisons - V1

|                 | Mean Difference | SE    | t      | p <sub>tukey</sub> | Symbol |
|-----------------|-----------------|-------|--------|--------------------|--------|
| CT H            | 9.333           | 2.618 | 3.566  | 0.055              |        |
| R               | 16.667          | 2.618 | 6.367  | < .001             | ###    |
| CT ABT          | -1.667          | 2.618 | -0.637 | 1.000              |        |
| PCT1 $\mu$ M    | -9.333          | 2.618 | -3.566 | 0.055              |        |
| PCT10 $\mu$ M   | -3.667          | 2.618 | -1.401 | 0.952              |        |
| H H+ABT         | -13.333         | 2.618 | -5.094 | 0.002              | *      |
| H+PCT1 $\mu$ M  | -13.333         | 2.618 | -5.094 | 0.001              | **     |
| H+PCT10 $\mu$ M | -13.667         | 2.618 | -5.221 | 0.001              | **     |
| R R+ABT         | -9.000          | 2.618 | -3.438 | 0.071              |        |
| R+PCT1 $\mu$ M  | -9.667          | 2.618 | -3.693 | 0.042              |        |
| R+PCT10 $\mu$ M | -15.667         | 2.618 | -5.985 | < .001             | ***    |

## ANOVA

### ANOVA - G2/M Cell Cycle

| Cases    | Sum of Squares | df | Mean Square | F     | p      |
|----------|----------------|----|-------------|-------|--------|
| V1       | 1813.3         | 11 | 164.85      | 15.41 | < .001 |
| Residual | 256.7          | 24 | 10.69       |       |        |

Note. Type III Sum of Squares

## Post Hoc Tests

### Post Hoc Comparisons - V1

|                 | Mean Difference | SE    | t      | p <sub>tukey</sub> | Symbol |
|-----------------|-----------------|-------|--------|--------------------|--------|
| CT H            | -2.667          | 2.670 | -0.999 | 0.996              |        |
| R               | 4.333           | 2.670 | 1.623  | 0.884              |        |
| CT ABT          | 5.000           | 2.670 | 1.873  | 0.764              |        |
| PCT1 $\mu$ M    | -4.333          | 2.670 | -1.623 | 0.884              |        |
| PCT10 $\mu$ M   | -5.333          | 2.670 | -1.997 | 0.691              |        |
| H H+ABT         | -7.000          | 2.670 | -2.622 | 0.321              |        |
| H+PCT1 $\mu$ M  | -9.000          | 2.670 | -3.371 | 0.082              |        |
| H+PCT10 $\mu$ M | -6.667          | 2.670 | -2.497 | 0.386              |        |
| R R+ABT         | -22.667         | 2.670 | -8.489 | < .001             | ***    |
| R+PCT1 $\mu$ M  | -16.667         | 2.670 | -6.242 | < .001             | ***    |
| R+PCT10 $\mu$ M | -26.000         | 2.670 | -9.737 | < .001             | ***    |

# Results figure 4

## ANOVA

### ANOVA - CFU

| Cases    | Sum of Squares | df | Mean Square | F     | p      |
|----------|----------------|----|-------------|-------|--------|
| V1       | 6.258e +6      | 11 | 568871      | 55.86 | < .001 |
| Residual | 244431         | 24 | 10185       |       |        |

*Note.* Type III Sum of Squares

### Post Hoc Tests

#### Post Hoc Comparisons - V1

|    |           | Mean Difference | SE    | t      | p tukey | Symbol |
|----|-----------|-----------------|-------|--------|---------|--------|
| CT | H         | 1076.667        | 82.40 | 13.066 | < .001  | ###    |
|    | R         | 1067.000        | 82.40 | 12.949 | < .001  | ###    |
| CT | ABT       | -98.333         | 82.40 | -1.193 | 0.985   |        |
|    | PCT1μM    | -66.000         | 82.40 | -0.801 | 0.999   |        |
|    | PCT10μM   | 47.000          | 82.40 | 0.570  | 1.000   |        |
| H  | H+ABT     | -219.000        | 82.40 | -2.658 | 0.304   |        |
|    | H+PCT1μM  | -132.667        | 82.40 | -1.610 | 0.889   |        |
|    | H+PCT10μM | -145.000        | 82.40 | -1.760 | 0.823   |        |
| R  | R+ABT     | -501.000        | 82.40 | -6.080 | < .001  | ***    |
|    | R+PCT1μM  | -568.000        | 82.40 | -6.893 | < .001  | ***    |
|    | R+PCT10μM | -584.667        | 82.40 | -7.095 | < .001  | ***    |

# Results Figure 5

## ANOVA

### ANOVA – RB1

| Cases    | Sum of Squares | df | Mean Square | F     | p      |
|----------|----------------|----|-------------|-------|--------|
| V1       | 33.905         | 11 | 3.082       | 24.00 | < .001 |
| Residual | 3.083          | 24 | 0.128       |       |        |

*Note.* Type III Sum of Squares

### Post Hoc Tests

#### Post Hoc Comparisons - V1

|           | Mean Difference | SE    | t      | p tukey | Symbol |
|-----------|-----------------|-------|--------|---------|--------|
| CT H      | -1.513          | 0.293 | -5.172 | 0.001   | ##     |
| R         | 1.610           | 0.293 | 5.502  | < .001  | ###    |
| CT ABT    | -0.540          | 0.293 | -1.845 | 0.779   |        |
| PCT1μM    | 0.817           | 0.293 | 2.791  | 0.245   |        |
| PCT10μM   | 1.600           | 0.293 | 5.468  | < .001  | ***    |
| H H+ABT   | 2.337           | 0.293 | 7.985  | < .001  | ***    |
| H+PCT1μM  | 2.933           | 0.293 | 10.024 | < .001  | ***    |
| H+PCT10μM | 2.590           | 0.293 | 8.851  | < .001  | ***    |
| R R+ABT   | 0.643           | 0.293 | 2.199  | 0.564   |        |
| R+PCT1μM  | -0.207          | 0.293 | -0.706 | 1.000   |        |
| R+PCT10μM | 0.420           | 0.293 | 1.435  | 0.944   |        |

# ANOVA

## ANOVA - RB2

| Cases    | Sum of Squares | df | Mean Square | F     | p      |
|----------|----------------|----|-------------|-------|--------|
| V1       | 1.003          | 11 | 0.091       | 39.68 | < .001 |
| Residual | 0.055          | 24 | 0.002       |       |        |

*Note.* Type III Sum of Squares

## Post Hoc Tests

### Post Hoc Comparisons - V1

|                 | Mean Difference | SE    | t      | p tukey | Symbol |
|-----------------|-----------------|-------|--------|---------|--------|
| CT H            | -0.057          | 0.039 | -1.448 | 0.941   |        |
| R               | -0.220          | 0.039 | -5.622 | < .001  | ###    |
| CT ABT          | 0.433           | 0.039 | 11.073 | < .001  | ***    |
| PCT1 $\mu$ M    | -0.197          | 0.039 | -5.025 | 0.002   | **     |
| PCT10 $\mu$ M   | -0.283          | 0.039 | -7.240 | < .001  | ***    |
| H H+ABT         | 0.057           | 0.039 | 1.448  | 0.941   |        |
| H+PCT1 $\mu$ M  | 0.183           | 0.039 | 4.685  | 0.004   | **     |
| H+PCT10 $\mu$ M | 0.170           | 0.039 | 4.344  | 0.009   | **     |
| R R+ABT         | 0.073           | 0.039 | 1.874  | 0.763   |        |
| R+PCT1 $\mu$ M  | 0.217           | 0.039 | 5.537  | < .001  | ***    |
| R+PCT10 $\mu$ M | 0.317           | 0.039 | 8.092  | < .001  | ***    |

# ANOVA

## ANOVA - P107

| Cases    | Sum of Squares | df | Mean Square | F     | p      |
|----------|----------------|----|-------------|-------|--------|
| V1       | 1.694          | 11 | 0.154       | 47.82 | < .001 |
| Residual | 0.077          | 24 | 0.003       |       |        |

*Note.* Type III Sum of Squares

## Post Hoc Tests

### Post Hoc Comparisons - V1

|                 | Mean Difference | SE    | t      | p tukey | Symbol |
|-----------------|-----------------|-------|--------|---------|--------|
| CT H            | -0.110          | 0.046 | -2.374 | 0.457   |        |
| R               | 0.370           | 0.046 | 7.987  | < .001  | ###    |
| CT ABT          | 0.060           | 0.046 | 1.295  | 0.972   |        |
| PCT1 $\mu$ M    | -0.300          | 0.046 | -6.476 | < .001  | ***    |
| PCT10 $\mu$ M   | -0.013          | 0.046 | -0.288 | 1.000   |        |
| H H+ABT         | 0.350           | 0.046 | 7.555  | < .001  | ***    |
| H+PCT1 $\mu$ M  | 0.530           | 0.046 | 11.440 | < .001  | ***    |
| H+PCT10 $\mu$ M | 0.493           | 0.046 | 10.649 | < .001  | ***    |
| R R+ABT         | -0.083          | 0.046 | -1.799 | 0.804   |        |
| R+PCT1 $\mu$ M  | -0.293          | 0.046 | -6.332 | < .001  | ***    |
| R+PCT10 $\mu$ M | -0.180          | 0.046 | -3.885 | 0.027   | *      |

# ANOVA

## ANOVA - P53

| Cases    | Sum of Squares | df | Mean Square | F     | p      |
|----------|----------------|----|-------------|-------|--------|
| V1       | 125.971        | 11 | 11.452      | 59.60 | < .001 |
| Residual | 4.611          | 24 | 0.192       |       |        |

*Note.* Type III Sum of Squares

## Post Hoc Tests

### Post Hoc Comparisons - V1

|     |                 | Mean Difference | SE    | t       | p tukey | Symbol |
|-----|-----------------|-----------------|-------|---------|---------|--------|
| CT  | H               | -4.017          | 0.358 | -11.223 | < .001  | ###    |
|     | R               | 0.250           | 0.358 | 0.699   | 1.000   |        |
| ABT | CT              | 1.270           | 0.358 | 3.549   | 0.056   |        |
|     | PCT1 $\mu$ M    | 0.060           | 0.358 | 0.168   | 1.000   |        |
|     | PCT10 $\mu$ M   | 0.690           | 0.358 | 1.928   | 0.733   |        |
| H   | H+ABT           | 4.200           | 0.358 | 11.735  | < .001  | ***    |
|     | H+PCT1 $\mu$ M  | 2.993           | 0.358 | 8.364   | < .001  | ***    |
|     | H+PCT10 $\mu$ M | 1.970           | 0.358 | 5.504   | < .001  | ***    |
| R   | R+ABT           | 0.997           | 0.358 | 2.785   | 0.248   |        |
|     | R+PCT1 $\mu$ M  | 3.787           | 0.358 | 10.580  | < .001  | ***    |
|     | R+PCT10 $\mu$ M | 0.573           | 0.358 | 1.602   | 0.893   |        |

# ANOVA

## ANOVA - P27

| Cases    | Sum of Squares | df | Mean Square | F     | p      |
|----------|----------------|----|-------------|-------|--------|
| V1       | 24.723         | 11 | 2.248       | 19.79 | < .001 |
| Residual | 2.726          | 24 | 0.114       |       |        |

*Note.* Type III Sum of Squares

## Post Hoc Tests

### Post Hoc Comparisons - V1

|                 | Mean Difference | SE    | t      | p <sub>tukey</sub> | Symbol |
|-----------------|-----------------|-------|--------|--------------------|--------|
| CT H            | -0.013          | 0.275 | -0.048 | 1.000              |        |
| R               | -0.360          | 0.275 | -1.308 | 0.970              |        |
| CT ABT          | 0.530           | 0.275 | 1.926  | 0.733              |        |
| PCT1 $\mu$ M    | -0.190          | 0.275 | -0.690 | 1.000              |        |
| PCT10 $\mu$ M   | -0.930          | 0.275 | -3.380 | 0.081              |        |
| H H+ABT         | 0.830           | 0.275 | 3.016  | 0.165              |        |
| H+PCT1 $\mu$ M  | 0.143           | 0.275 | 0.521  | 1.000              |        |
| H+PCT10 $\mu$ M | -0.220          | 0.275 | -0.800 | 0.999              |        |
| R R+ABT         | 2.027           | 0.275 | 7.365  | < .001             | ***    |
| R+PCT1 $\mu$ M  | 0.540           | 0.275 | 1.962  | 0.712              |        |
| R+PCT10 $\mu$ M | 2.337           | 0.275 | 8.492  | < .001             | ***    |



# ANOVA

## ANOVA - P21

| Cases    | Sum of Squares | df | Mean Square | F     | p      |
|----------|----------------|----|-------------|-------|--------|
| V1       | 4.902          | 11 | 0.446       | 16.34 | < .001 |
| Residual | 0.655          | 24 | 0.027       |       |        |

*Note.* Type III Sum of Squares

## Post Hoc Tests

### Post Hoc Comparisons - V1

|     |                 | Mean Difference | SE    | t      | p <sub>tukey</sub> | Symbol |
|-----|-----------------|-----------------|-------|--------|--------------------|--------|
| CT  | H               | -0.740          | 0.135 | -5.488 | < .001             | ###    |
|     | R               | -1.087          | 0.135 | -8.059 | < .001             | ###    |
| ABT | CT              | -0.163          | 0.135 | -1.211 | 0.983              |        |
|     | PCT1 $\mu$ M    | 0.077           | 0.135 | 0.569  | 1.000              |        |
|     | PCT10 $\mu$ M   | 0.137           | 0.135 | 1.014  | 0.996              |        |
| H   | H+ABT           | 0.257           | 0.135 | 1.904  | 0.746              |        |
|     | H+PCT1 $\mu$ M  | 0.417           | 0.135 | 3.090  | 0.144              |        |
|     | H+PCT10 $\mu$ M | 0.233           | 0.135 | 1.730  | 0.837              |        |
| R   | R+ABT           | 0.600           | 0.135 | 4.450  | 0.007              | **     |
|     | R+PCT1 $\mu$ M  | 0.497           | 0.135 | 3.683  | 0.043              | *      |
|     | R+PCT10 $\mu$ M | 0.610           | 0.135 | 4.524  | 0.006              | **     |

# ANOVA

## ANOVA - P16

| Cases    | Sum of Squares | df | Mean Square | F     | p      |
|----------|----------------|----|-------------|-------|--------|
| V1       | 7.998          | 11 | 0.727       | 20.83 | < .001 |
| Residual | 0.838          | 24 | 0.035       |       |        |

*Note.* Type III Sum of Squares

## Post Hoc Tests

### Post Hoc Comparisons - V1

|                 | Mean Difference | SE    | t      | p <sub>tukey</sub> | Symbol |
|-----------------|-----------------|-------|--------|--------------------|--------|
| CT H            | -0.533          | 0.153 | -3.496 | 0.063              |        |
| R               | -0.670          | 0.153 | -4.392 | 0.008              | ##     |
| CT ABT          | 0.023           | 0.153 | 0.153  | 1.000              |        |
| PCT1 $\mu$ M    | 0.257           | 0.153 | 1.683  | 0.859              |        |
| PCT10 $\mu$ M   | 0.667           | 0.153 | 4.371  | 0.009              | **     |
| H H+ABT         | 0.013           | 0.153 | 0.087  | 1.000              |        |
| H+PCT1 $\mu$ M  | -0.127          | 0.153 | -0.830 | 0.999              |        |
| H+PCT10 $\mu$ M | -0.037          | 0.153 | -0.240 | 1.000              |        |
| R R+ABT         | 0.767           | 0.153 | 5.026  | 0.002              | **     |
| R+PCT1 $\mu$ M  | 0.947           | 0.153 | 6.206  | < .001             | ***    |
| R+PCT10 $\mu$ M | 1.300           | 0.153 | 8.523  | < .001             | ***    |

# ANOVA

## ANOVA - SIRT1

| Cases    | Sum of Squares | df | Mean Square | F     | p      |
|----------|----------------|----|-------------|-------|--------|
| V1       | 41.807         | 11 | 3.801       | 86.94 | < .001 |
| Residual | 1.049          | 24 | 0.044       |       |        |

*Note.* Type III Sum of Squares

## Post Hoc Tests

### Post Hoc Comparisons - V1

|                 | Mean Difference | SE    | t     | p <sub>tukey</sub> | Symbol |
|-----------------|-----------------|-------|-------|--------------------|--------|
| CT H            | 1.467           | 0.171 | 8.591 | < .001             | ###    |
| R               | 1.300           | 0.171 | 7.615 | < .001             | ###    |
| CT ABT          | 0.023           | 0.171 | 0.137 | 1.000              |        |
| PCT1 $\mu$ M    | 0.490           | 0.171 | 2.870 | 0.213              |        |
| PCT10 $\mu$ M   | 0.443           | 0.171 | 2.597 | 0.334              |        |
| H H+ABT         | 1.067           | 0.171 | 6.248 | < .001             | ***    |
| H+PCT1 $\mu$ M  | 1.367           | 0.171 | 8.005 | < .001             | ***    |
| H+PCT10 $\mu$ M | 1.653           | 0.171 | 9.685 | < .001             | ***    |
| R R+ABT         | 0.367           | 0.171 | 2.148 | 0.597              |        |
| R+PCT1 $\mu$ M  | 0.250           | 0.171 | 1.464 | 0.936              |        |
| R+PCT10 $\mu$ M | 1.500           | 0.171 | 8.786 | < .001             | ***    |
