# Supplementary figures and images for: Biomolecular Evaluation of Piceatannol’s Effects in Counteracting the Senescence of Mesenchymal Stromal Cells: A New Candidate for Senotherapeutics?
Source: MDPI journal article supplement (doi:10.3390/ijms222111619), 2021-10-27

# Supp File 3

Raw data WB images

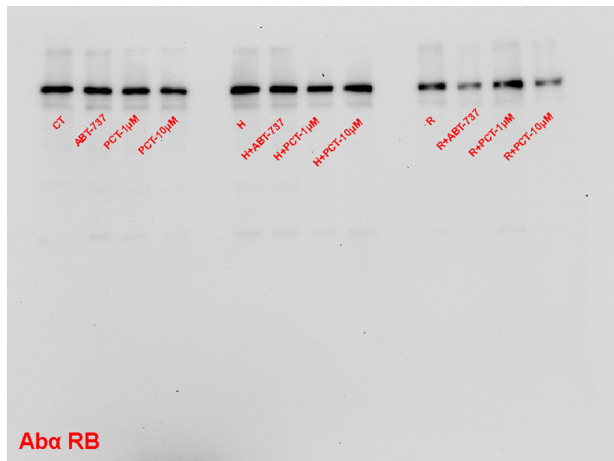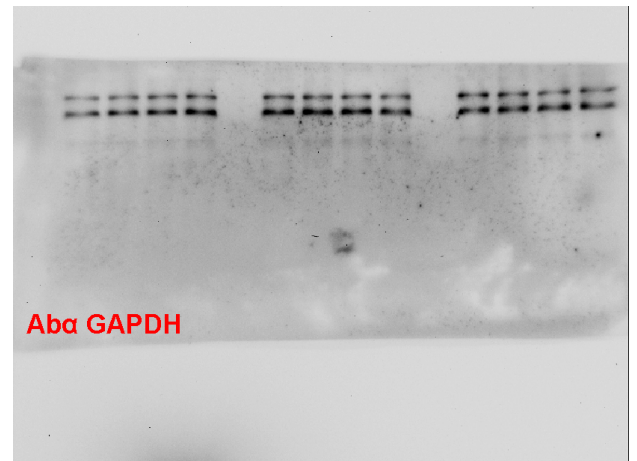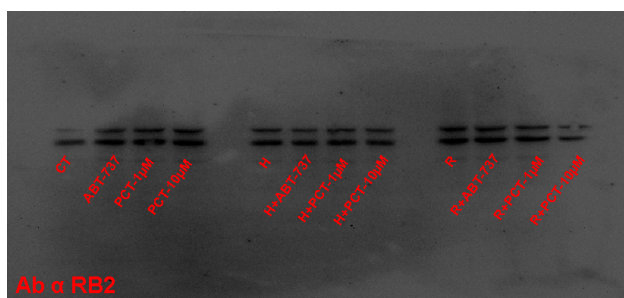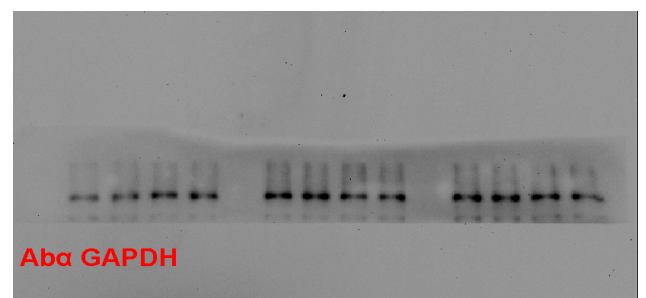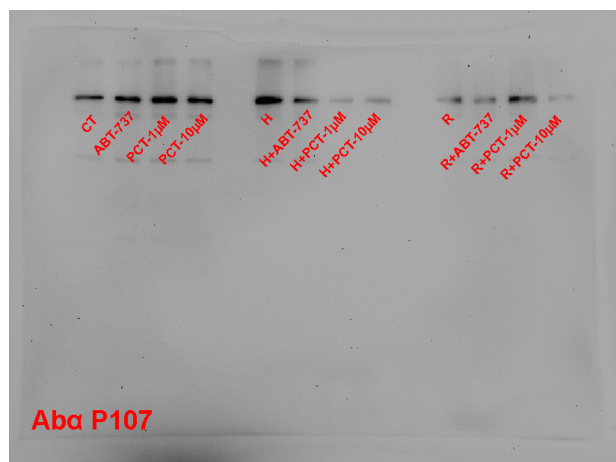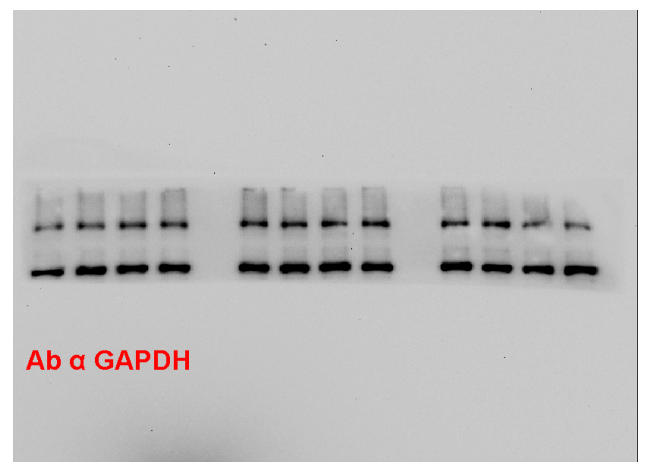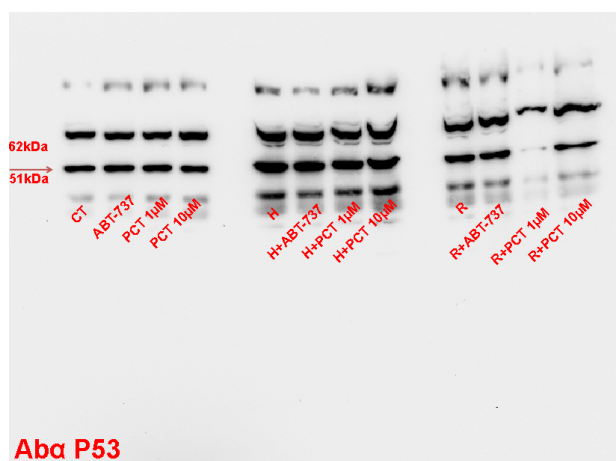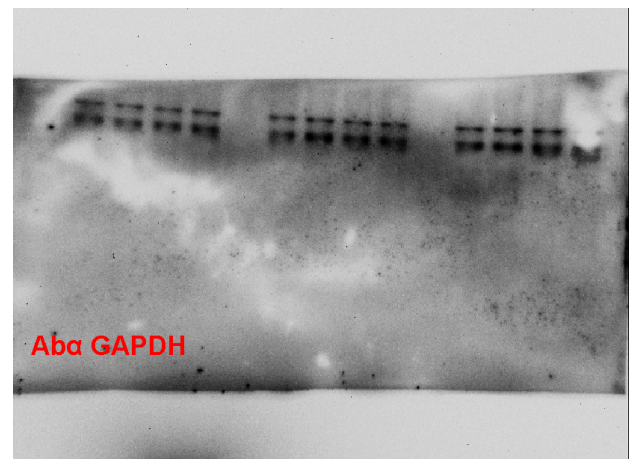

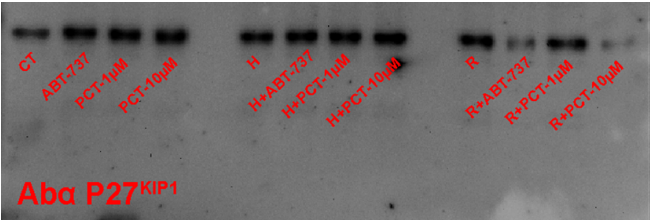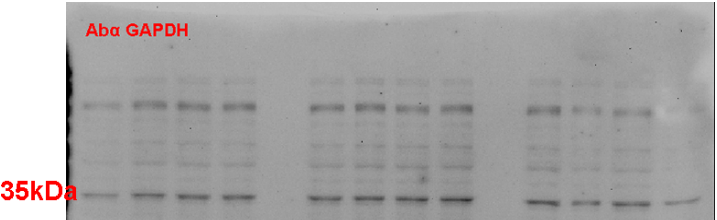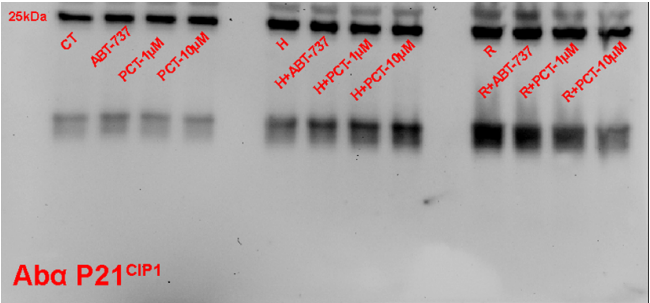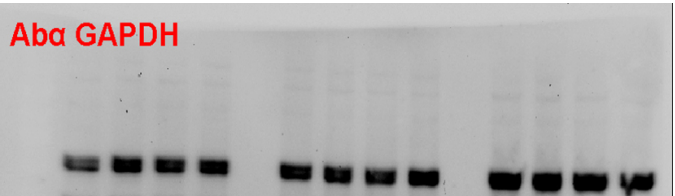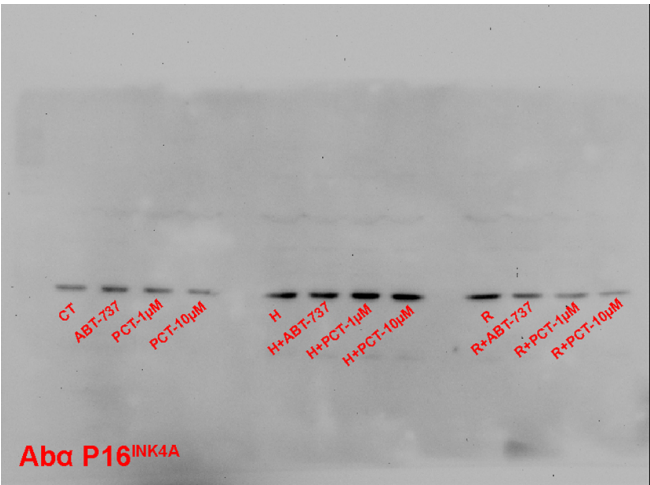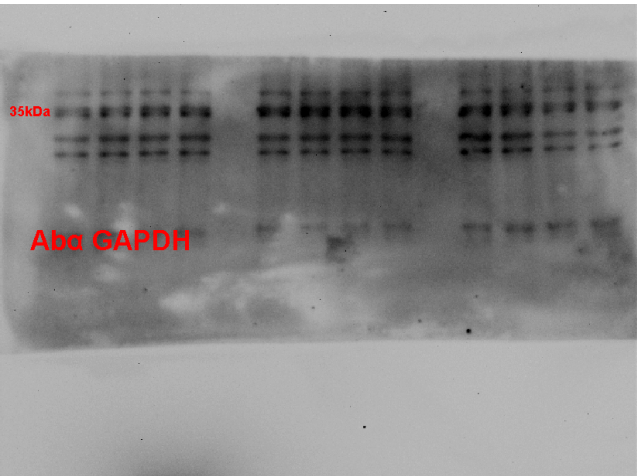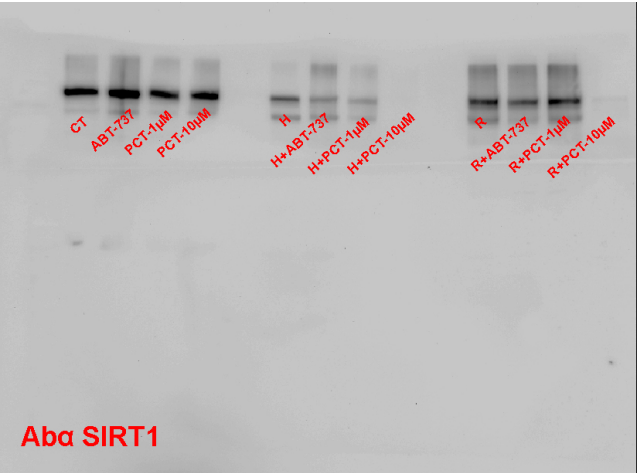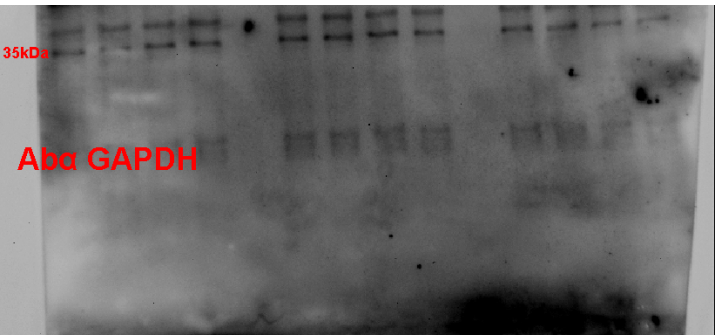

Supplement: s1 [file s1]
